# Supplementary material
Source: PubMed Central journal article supplement (PMC8688271)
Supplement: NIHMS1748362-supplement-1.pdf [file NIHMS1748362-supplement-1.pdf]

**Appendix**  
**Childhood Abuse-Related Weight Gain: An Investigation of Potential Resilience Factors**  
**Mason et al.**

**Appendix Table 1.** Missingness of Potential Modifiers Due to Survey Non-Response and Missingness Among Responders in Analytic Sample<sup>a</sup>

| <b>Variable</b>                                                 | <b>Survey(s)</b>        | <b>Total missing due to survey non response, n</b> | <b>Total missing among survey responders, n</b> | <b>Total missing in analytic sample, n</b> |
|-----------------------------------------------------------------|-------------------------|----------------------------------------------------|-------------------------------------------------|--------------------------------------------|
| Social status                                                   | 1999 and/or 2001        | 264                                                | 371                                             | 635                                        |
| Neighborhood safety                                             | 1997, 1998, and/or 1999 | 92                                                 | 126                                             | 218                                        |
| Adult outside family made participant feel important or special | 2007                    | — <sup>b</sup>                                     | 0                                               | 0                                          |
| Relationship with mother                                        | 2005                    | 370                                                | 23                                              | 393                                        |
| Religious service attendance                                    | 1999                    | 578                                                | 422                                             | 1,000                                      |
| Prayer/meditation                                               | 1999                    | 578                                                | 429                                             | 1,007                                      |
| Family structure                                                | 1996 (baseline)         | — <sup>c</sup>                                     | 0                                               | 0                                          |
| Extended family                                                 | 1996 (baseline)         | — <sup>c</sup>                                     | 0                                               | 0                                          |

<sup>a</sup>Excludes those who did not respond to the 2007 survey on which abuse was assessed (n=7,020), those who did not respond to the 2013 survey on which BMI was assessed (n=3,058), those missing abuse data (n=473) or BMI data (n=102).

<sup>b</sup>Analytic sample was restricted to those with 2007 responses.

<sup>c</sup>All participants had baseline data.
